# Supplementary material for: Evaluation of different bridged organosilicas as efficient adsorbents for the herbicide S-metolachlor
Source: Royal Society of Chemistry journal article supplement (doi:10.1039/c5ra02711j), 2015-01-01
Supplement: c5ra02711j1.pdf [file c5ra02711j1.pdf]

## Supplementary information

### Evaluation of different bridged organosilicas as efficient adsorbents for the herbicide S-metolachlor

María Isabel López,<sup>a</sup> Rocío Otero,<sup>b</sup> Dolores Esquivel,<sup>a</sup> César Jiménez-Sanchidrián,<sup>a</sup> José María Fernández,<sup>b,\*</sup> and Francisco José Romero-Salguero<sup>a,\*</sup>

<sup>a</sup> *Departamento de Química Orgánica, Instituto Universitario de Química Fina y Nanoquímica (IUQFN), Campus de Rabanales, Universidad de Córdoba, Campus de Excelencia Internacional Agroalimentario (ceiA3), Córdoba, Spain.*

<sup>b</sup> *Departamento de Química Inorgánica e Ingeniería Química, Instituto Universitario de Química Fina y Nanoquímica (IUQFN), Campus de Rabanales, Universidad de Córdoba, Campus de Excelencia Internacional Agroalimentario (ceiA3), Córdoba, Spain.*

\* Corresponding authors.

Tel.: +34 957212065; fax: +34 957212066. E-mail address: [go2rosaf@uco.es](mailto:go2rosaf@uco.es) (F. J. Romero-Salguero).

Tel.: +34 957218648; fax: +34 957580644. E-mail address: [um1feroj@uco.es](mailto:um1feroj@uco.es) (J. M. Fernández).

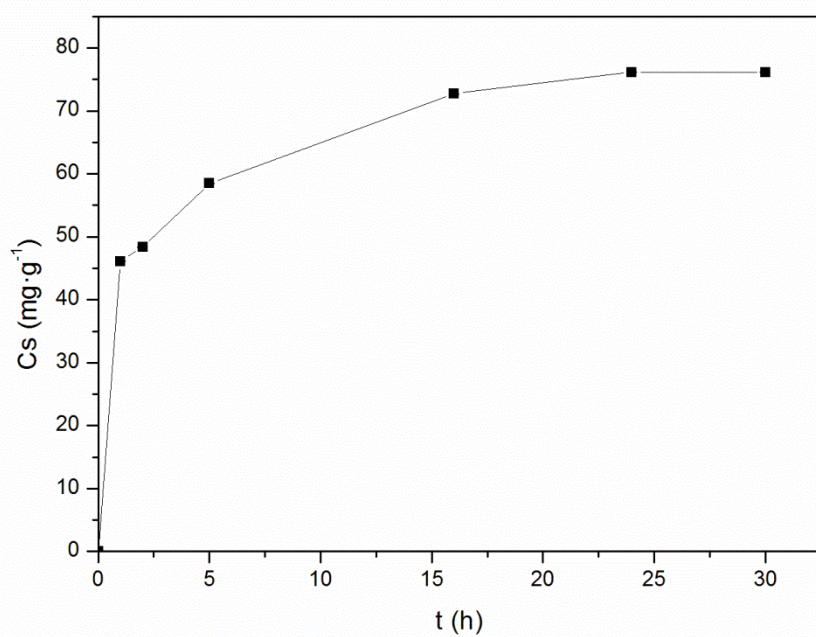

**Fig. S1** Adsorption kinetics of S-metolachlor on PhOS-40.

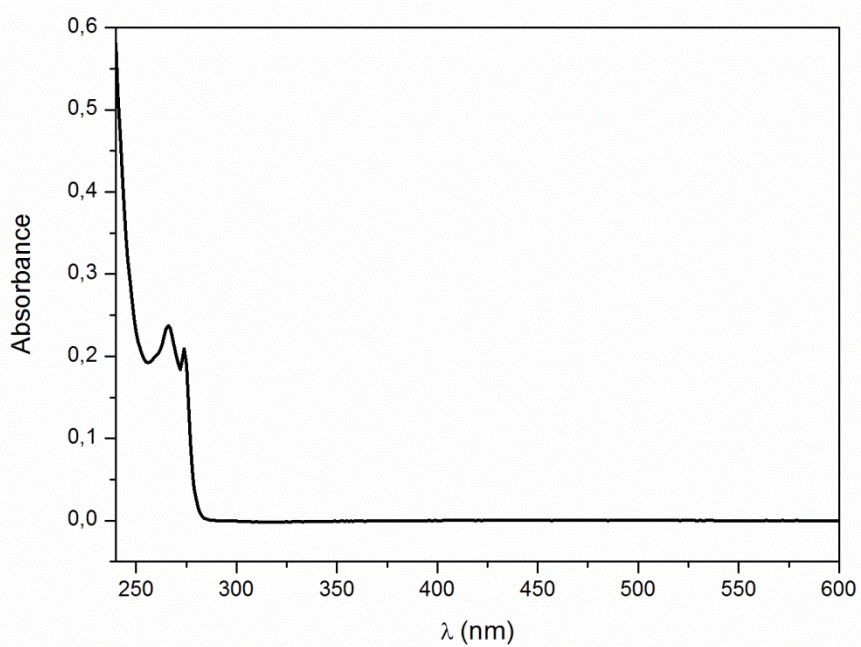

**Fig. S2** UV-Vis spectrum of S-metolachlor.

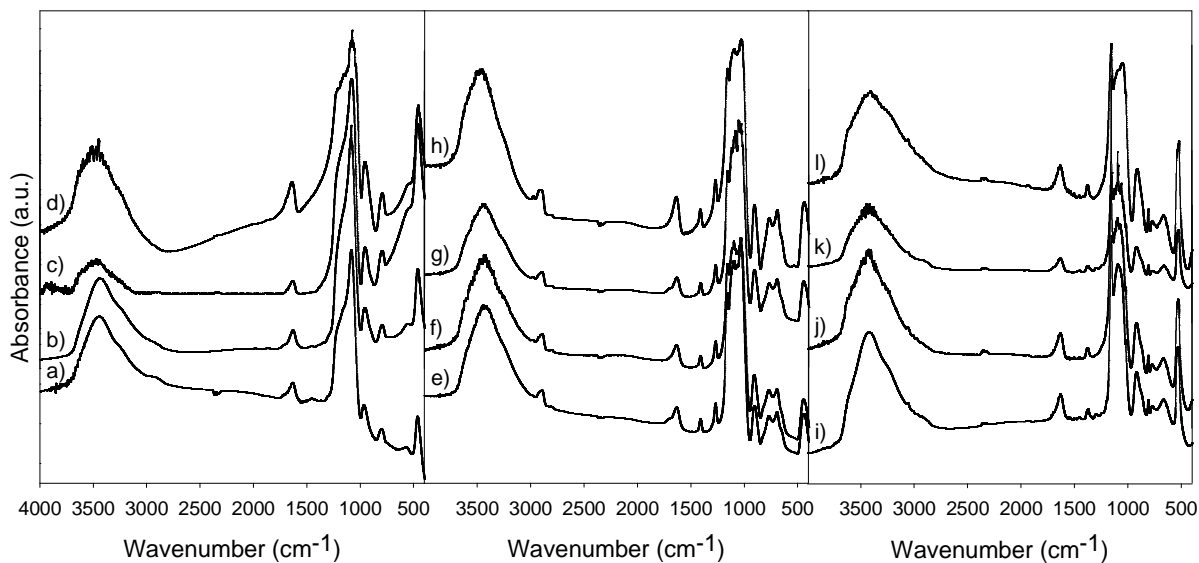

**Fig. S3** FT-IR spectra of non-ordered porous (organo)silicas and periodic mesoporous (organo)silicas: a) S-20, b) S-40, c) S-60, d) PMS, e) EOS-20, f) EOS-40, g) EOS-60, h) E-PMO, i) PhOS-20, j) PhOS-40, k) PhOS-60 and l) Ph-PMS.

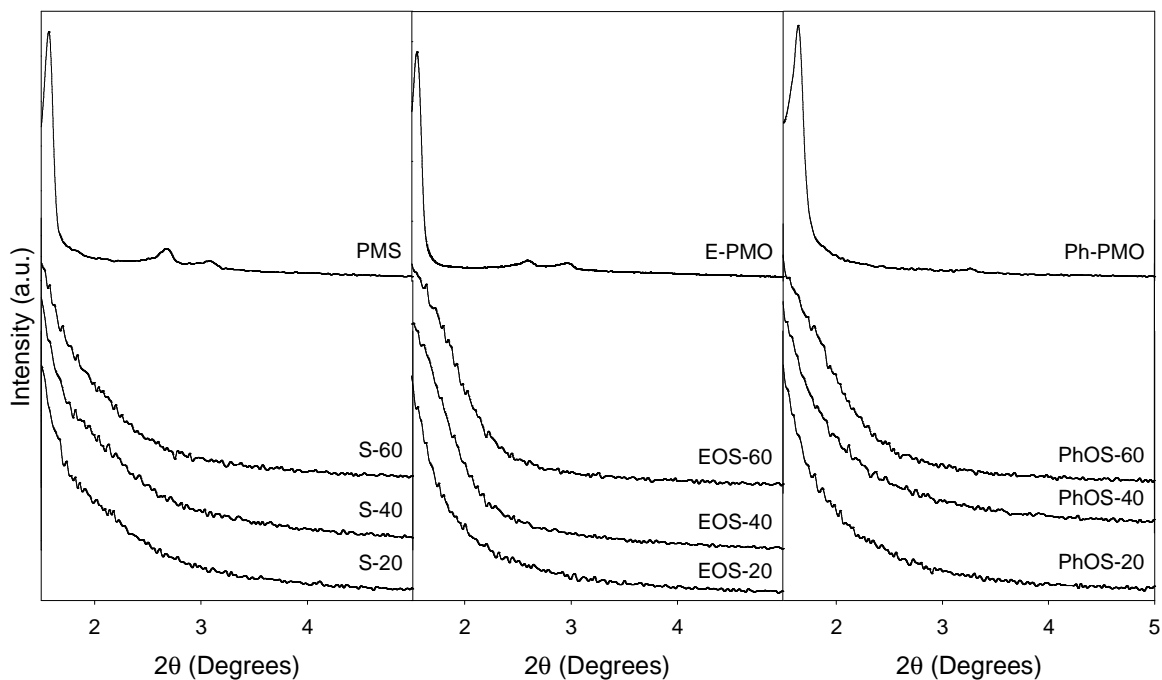

**Fig. S4** XRD patterns of non-ordered porous (organo)silicas and periodic mesoporous (organo)silicas.
